# Supplementary material
Source: Springer Nature journal article supplement (https://www.springermedizin.de/resource/supplementary/12885_2013_4084_MOESM5_ESM.pdf/9465260)

# MiaPaca2

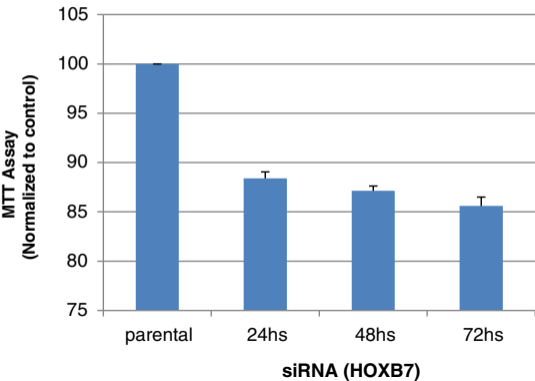

# Capan 1

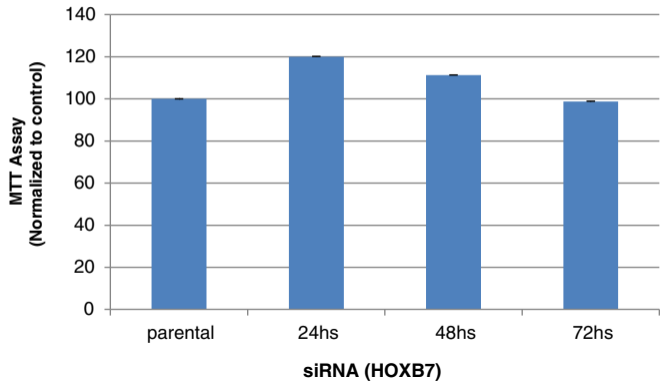

Supplement: MOESM5 [file 9465260]
